# Supplementary material for: Production and purification of homogenous recombinant human selenoproteins reveals a unique codon skipping event in E. coli and GPX4-specific affinity to bromosulfophthalein
Source: PubMed Central journal article supplement (PMC8326192; doi:10.1016/j.redox.2021.102070), 2021-07-17
Supplement: mmc1.pdf [file mmc1.pdf]

| #  | b                | Seq. | y                | #  |
|----|------------------|------|------------------|----|
| 1  | 58.0287          | G    |                  | 15 |
| 2  | <b>205.0972</b>  | F    | 1491.7624        | 14 |
| 3  | <b>304.1656</b>  | V    | 1344.6940        | 13 |
| 4  | <b>464.1962</b>  | C    | <b>1245.6256</b> | 12 |
| 5  | <b>577.2803</b>  | I    | <b>1085.5949</b> | 11 |
| 6  | <b>676.3487</b>  | V    | <b>972.5109</b>  | 10 |
| 7  | <b>777.3964</b>  | T    | <b>873.4425</b>  | 9  |
| 8  | 891.4393         | N    | <b>772.3948</b>  | 8  |
| 9  | <b>990.5077</b>  | V    | <b>658.3519</b>  | 7  |
| 10 | <b>1061.5448</b> | A    | <b>559.2834</b>  | 6  |
| 11 | 1148.5769        | S    | <b>488.2463</b>  | 5  |
| 12 | <b>1276.6354</b> | Q    | <b>401.2143</b>  | 4  |
| 13 | <b>1345.6569</b> | U*   | <b>273.1557</b>  | 3  |
| 14 | 1402.6784        | G    | <b>204.1343</b>  | 2  |
| 15 |                  | K    | <b>147.1128</b>  | 1  |

| #  | b                | Seq. | y                | #  |
|----|------------------|------|------------------|----|
| 1  | 58.0287          | G    |                  | 14 |
| 2  | <b>205.0972</b>  | F    | 1422.7410        | 13 |
| 3  | <b>304.1656</b>  | V    | <b>1275.6725</b> | 12 |
| 4  | <b>464.1962</b>  | C    | <b>1176.6041</b> | 11 |
| 5  | <b>577.2803</b>  | I    | <b>1016.5735</b> | 10 |
| 6  | <b>676.3487</b>  | V    | <b>903.4894</b>  | 9  |
| 7  | <b>777.3964</b>  | T    | <b>804.4210</b>  | 8  |
| 8  | <b>891.4393</b>  | N    | <b>703.3733</b>  | 7  |
| 9  | <b>990.5077</b>  | V    | <b>589.3304</b>  | 6  |
| 10 | <b>1061.5448</b> | A    | <b>490.2620</b>  | 5  |
| 11 | 1148.5769        | S    | <b>419.2249</b>  | 4  |
| 12 | 1276.6354        | Q    | <b>332.1928</b>  | 3  |
| 13 | <b>1333.6569</b> | G    | <b>204.1343</b>  | 2  |
| 14 |                  | K    | <b>147.1128</b>  | 1  |

| #  | b                | Seq. | y                | #  |
|----|------------------|------|------------------|----|
| 1  | 58.0287          | G    |                  | 15 |
| 2  | <b>205.0972</b>  | F    | 1585.8043        | 14 |
| 3  | <b>304.1656</b>  | V    | 1438.7359        | 13 |
| 4  | <b>464.1962</b>  | C    | <b>1339.6675</b> | 12 |
| 5  | <b>577.2803</b>  | I    | <b>1179.6368</b> | 11 |
| 6  | <b>676.3487</b>  | V    | <b>1066.5527</b> | 10 |
| 7  | <b>777.3964</b>  | T    | <b>967.4843</b>  | 9  |
| 8  | 891.4393         | N    | <b>866.4367</b>  | 8  |
| 9  | <b>990.5077</b>  | V    | 752.3937         | 7  |
| 10 | <b>1061.5448</b> | A    | <b>653.3253</b>  | 6  |
| 11 | 1148.5769        | S    | 582.2882         | 5  |
| 12 | 1276.6354        | Q    | 495.2562         | 4  |
| 13 | <b>1439.6988</b> | Y    | <b>367.1976</b>  | 3  |
| 14 | 1496.7202        | G    | <b>204.1343</b>  | 2  |
| 15 |                  | K    | <b>147.1128</b>  | 1  |

MS/MS Fragmentation of **GFVCIVTNVASQU\*GK (GPx4 wt)**  
 Found in GPX4\_HUMAN from (774.899, 2+)  
 Monoisotopic mass of neutral peptide  
 Mr(calc): 1547.7766  
 Fixed modifications: Carbamidomethyl (C)  
 Variable modifications: U13 : **Secys->Dha (U)**  
 Matches (**Bold Red**); Ions Score: 99 Expect: 8.7e-10

MS/MS Fragmentation of **GFVCIVTNVASQ(-)GK (U46Null)**  
 Found in GPX4\_HUMAN from (740.391, 2+)  
 Monoisotopic mass of neutral peptide  
 Mr(calc): 1478.7552  
 Fixed modifications: Carbamidomethyl (C); **Secys->Null**  
 Variable modifications:  
 Matches (**Bold Red**); Ions Score: 79 Expect: 6.8e-07

MS/MS Fragmentation of **GFVCIVTNVASQYGK (U46Y)**  
 Found in GPX4\_HUMAN from (821.916, 2+)  
 Monoisotopic mass of neutral peptide  
 Mr(calc): 1641.8185  
 Fixed modifications: Carbamidomethyl (C)  
 Variable modifications: U13 : **Secys->Y (U)**  
 Matches (**Bold Red**); Ions Score: 79 Expect: 6.8e-07

*Figure 1- Supplement –MS/MS characterization of recombinant human GPX4 species purified from E. coli.*  
 The figure summarizes the fragmentation patterns and distinct features of the key recombinant GPX4-derived tryptic peptides shown in Figure 4C of the main paper.

| #  | b                | Seq. | y                | #  |
|----|------------------|------|------------------|----|
| 1  | 58.0287          | G    |                  | 15 |
| 2  | <b>205.0972</b>  | F    | 1550.7995        | 14 |
| 3  | <b>304.1656</b>  | V    | <b>1403.7311</b> | 13 |
| 4  | <b>464.1962</b>  | C    | <b>1304.6627</b> | 12 |
| 5  | <b>577.2803</b>  | I    | <b>1144.6321</b> | 11 |
| 6  | <b>676.3487</b>  | V    | <b>1031.5480</b> | 10 |
| 7  | <b>777.3964</b>  | T    | <b>932.4796</b>  | 9  |
| 8  | 891.4393         | N    | <b>831.4319</b>  | 8  |
| 9  | <b>990.5077</b>  | V    | <b>717.3890</b>  | 7  |
| 10 | <b>1061.5448</b> | A    | <b>618.3206</b>  | 6  |
| 11 | <b>1148.5769</b> | S    | <b>547.2834</b>  | 5  |
| 12 | <b>1276.6354</b> | Q    | <b>460.2514</b>  | 4  |
| 13 | 1404.6940        | Q    | <b>332.1928</b>  | 3  |
| 14 | 1461.7155        | G    | <b>204.1343</b>  | 2  |
| 15 |                  | K    | <b>147.1128</b>  | 1  |

MS/MS Fragmentation of **GFVCIVTNVASQQGK (U46Q)**  
 Found in GPX4\_HUMAN from (804.411, 2+)  
 Monoisotopic mass of neutral peptide  
 Mr(calc): 1606.8138  
 Fixed modifications: Carbamidomethyl (C)  
 Variable modifications: U13 : **Secys->Q** (U)  
 Matches (**Bold Red**); Ions Score: 109 Expect: 2.1e-10

| #  | b                | Seq. | y               | #  |
|----|------------------|------|-----------------|----|
| 1  |                  | G    |                 | 13 |
| 2  | <b>205.0971</b>  | F    |                 | 12 |
| 3  | <b>304.1656</b>  | V    | 1218.6511       | 11 |
| 4  | <b>464.1962</b>  | C    | 1119.5827       | 10 |
| 5  | <b>577.2803</b>  | I    | <b>959.5520</b> | 9  |
| 6  | <b>676.3487</b>  | V    | <b>846.4680</b> | 8  |
| 7  | <b>777.3964</b>  | T    | <b>747.3995</b> | 7  |
| 8  | 891.4393         | N    | <b>646.3519</b> | 6  |
| 9  | <b>990.5077</b>  | V    | 532.3089        | 5  |
| 10 | <b>1061.5448</b> | A    | <b>433.2405</b> | 4  |
| 11 | 1148.5768        | S    | <b>362.2034</b> | 3  |
| 12 | 1276.6354        | Q    | <b>275.1714</b> | 2  |
| 13 |                  | K    | <b>147.1128</b> | 1  |

MS/MS Fragmentation of **GFVCIVTNVASQK (U46K)**  
 Found in GPX4\_HUMAN from (711.882, 2+)  
 Monoisotopic mass of neutral peptide  
 Mr(calc): 1421.7337  
 Fixed modifications: Carbamidomethyl (C)  
 Variable modifications: U13 : **Secys->K** (U)  
 Matches (**Bold Red**); Ions Score: 48 Expect: 4.8e-05

*Figure 1- Supplement, cont'd* - Characterization of recombinant human GPX4 forms purified from *E. coli*. The figure summarizes the fragmentation patterns and distinct features of the key recombinant GPX4-derived tryptic peptides shown in Figure 4C of the main paper.

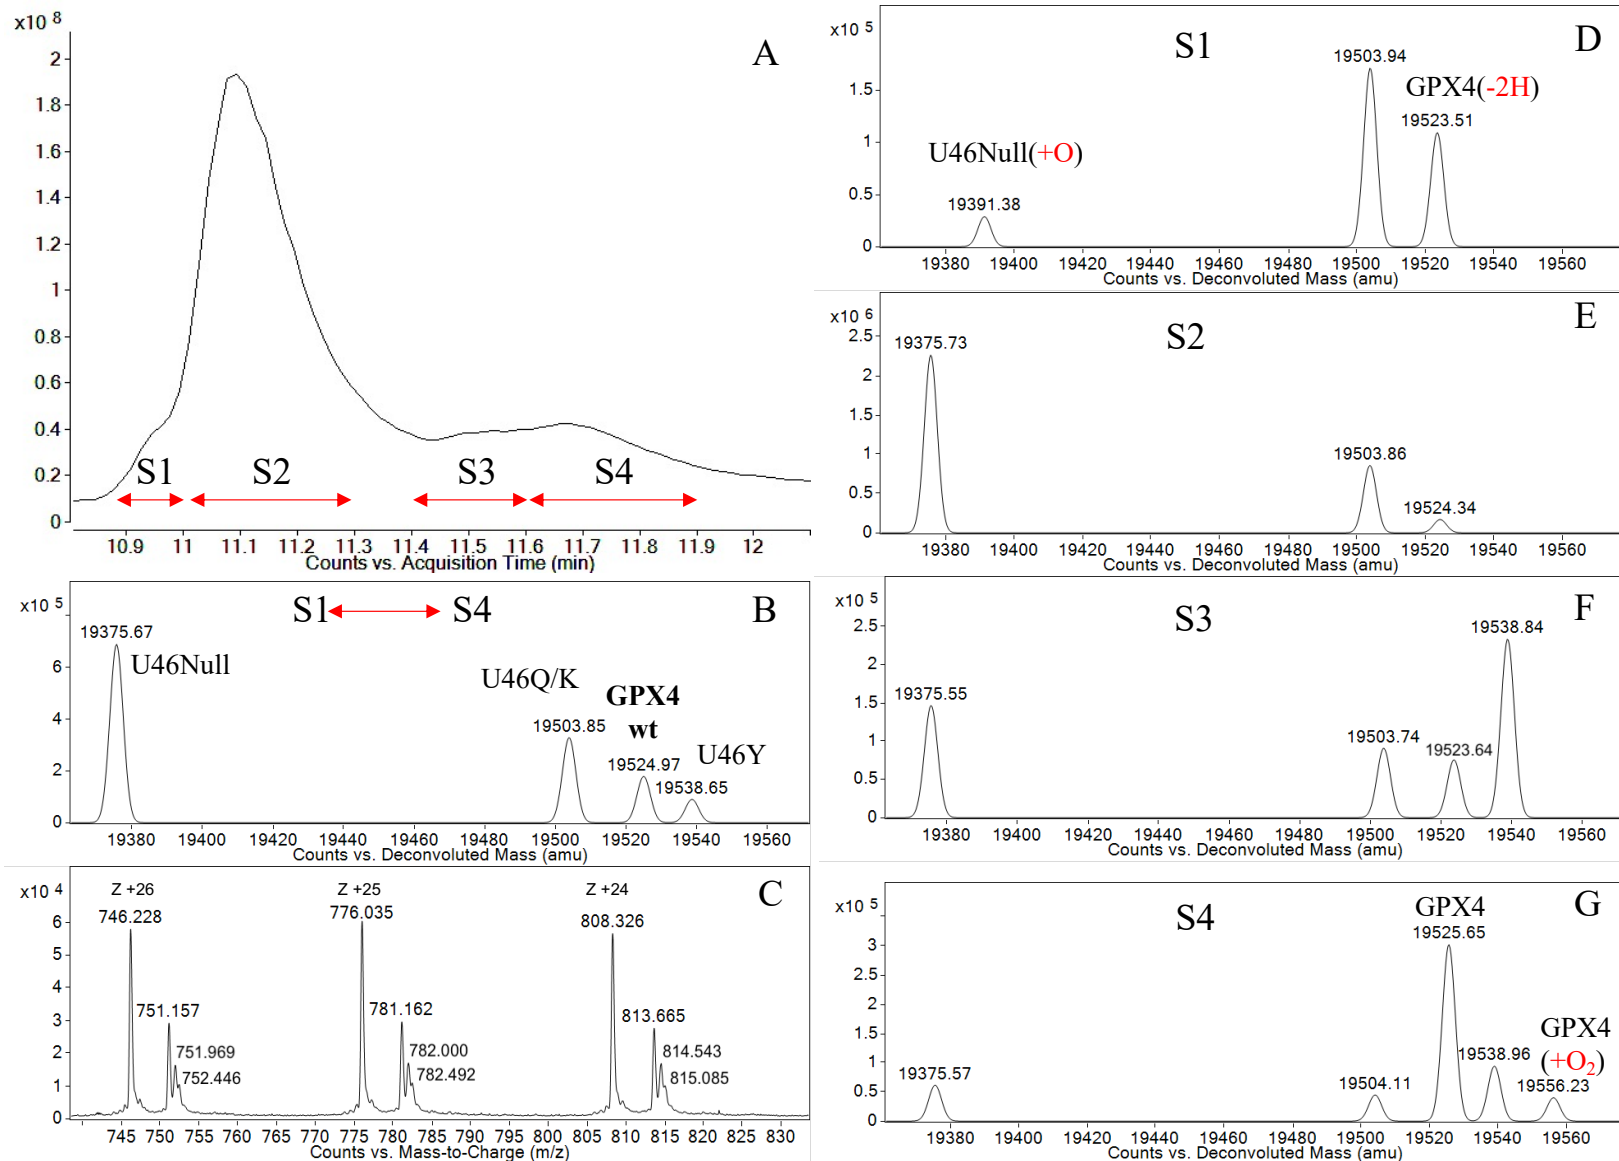

*Supplementary Figure 2- RP-HPLC-Mass-Spectrometry characterization of recombinant human GPX4 purified from E. coli*  
*A) RP-HPLC/MS total ion current (TIC) trace. B) GPX4 species disclosed by MS, with mass values (amu) obtained by deconvolution of high resolution MS1 spectra as detailed in panel C. Panels D-G show the GPX4 species identified as in panel B, but specifically in the chromatography regions designated S1,S2,S3 and S4 in panel A, respectively.*
